# Supplementary material for: Genetic variants affecting NQO1 protein levels impact the efficacy of idebenone treatment in Leber hereditary optic neuropathy
Source: PubMed Central journal article supplement — Cell Rep Med. 2024 Jan 24;5(2):101383. doi: 10.1016/j.xcrm.2023.101383 (PMC10897523; doi:10.1016/j.xcrm.2023.101383), 2024-01-24
Supplement: mmc1.pdf [file mmc1.pdf]

**Supplemental information**

**Genetic variants affecting NQO1 protein levels impact  
the efficacy of idebenone treatment  
in Leber hereditary optic neuropathy**

**Serena Jasmine Aleo, Valentina Del Dotto, Martina Romagnoli, Claudio Fiorini, Giada Capirossi, Camille Peron, Alessandra Maresca, Leonardo Caporali, Mariantonietta Capristo, Concetta Valentina Tropeano, Claudia Zanna, Fred N. Ross-Cisneros, Alfredo A. Sadun, Maria Gemma Pignataro, Carla Giordano, Chiara Fasano, Andrea Cavaliere, Anna Maria Porcelli, Gaia Tioli, Francesco Musiani, Alessia Catania, Costanza Lamperti, Stefania Bianchi Marzoli, Annamaria De Negri, Maria Lucia Cascavilla, Marco Battista, Piero Barboni, Michele Carbonelli, Giulia Amore, Chiara La Morgia, Dmitrii Smirnov, Catalina Vasilescu, Aiman Farzeen, Beryll Blickhaeuser, Holger Prokisch, Claudia Priglinger, Bettina Livonius, Claudia B. Catarino, Thomas Klopstock, Valeria Tiranti, Valerio Carelli, and Anna Maria Ghelli**

## Supplementary Figures

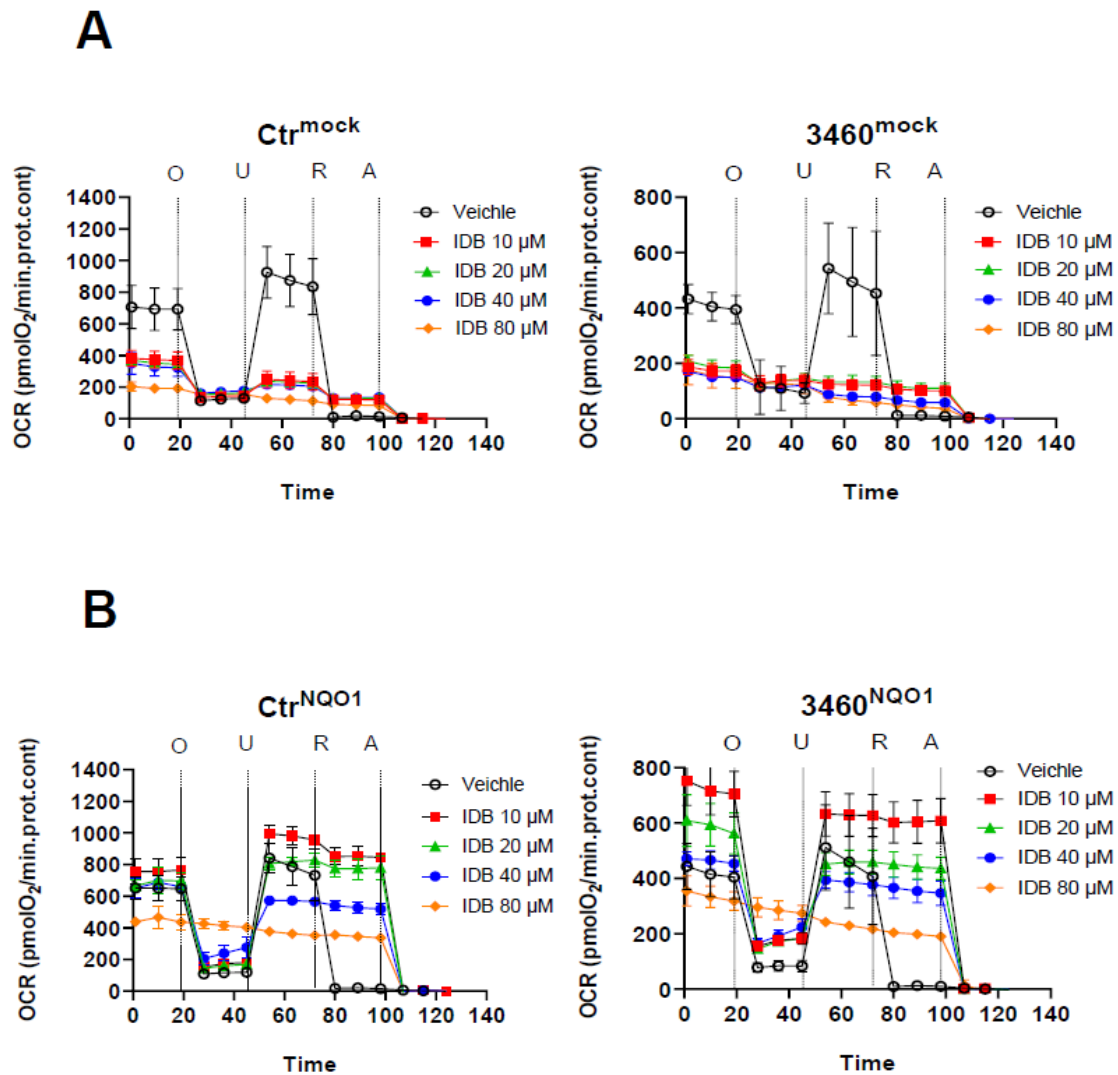

## Supplementary Figure 1 related to Figure 1B and 1C

Idebenone dose-dependence of mitochondrial respiration.

- A) Mitochondrial respiration rates measured with Mito-stress protocol of control ( $\text{Ctr}^{\text{mock}}$ ) and  $\text{m.3460G>A/MT-ND1}$  LHON cybrids ( $3460^{\text{mock}}$ ) with different concentrations of idebenone. Basal respiration (OCR basal), oligomycin (O) inhibited respiration (proton leak) and maximal respiration rate (OCR FCCP, U) were calculated subtracting the OCR in the presence of rotenone (R) and antimycin A (A). All values are normalized for protein cellular content measured by SRB assay. Empty circles correspond to OCR values measured in cells treated with the vehicle DMSO (ten and seven independent experiments for  $\text{Ctr}^{\text{mock}}$  and  $3460^{\text{mock}}$ , respectively). Red squares correspond to OCR values measured in cells treated with 10

$\mu\text{M}$  idebenone (six and five independent experiments for  $\text{Ctr}^{\text{mock}}$  and  $3460^{\text{mock}}$ , respectively). Green triangles, blue circles and orange diamonds correspond to OCR values measured in cells treated with 20, 40, 80  $\mu\text{M}$  idebenone, respectively (two independent experiments for each concentration). Data are reported as mean  $\pm$  SD.

- B)** Mitochondrial respiration rates measured with Mito-stress protocol of control ( $\text{Ctr}^{\text{NQO1}}$ ) and m.3460G>A/*MT-ND1* LHON cybrids ( $3460^{\text{NQO1}}$ ) with different concentrations of idebenone. The experimental conditions are the same described in panel A. Empty circles correspond to OCR values measured in cells treated with the vehicle DMSO (eight and five experiments for  $\text{Ctr}^{\text{NQO1}}$  and  $3460^{\text{NQO1}}$ , respectively). Red squares correspond to OCR values measured in cells treated with 10  $\mu\text{M}$  idebenone (six and five experiments for  $\text{Ctr}^{\text{NQO1}}$  and  $3460^{\text{NQO1}}$ , respectively). Green triangles, blue circles and orange diamonds correspond to OCR values measured in cells treated with 20, 40, 80  $\mu\text{M}$  idebenone, respectively (two independent experiments for each concentration). Data are reported as mean  $\pm$  SD.

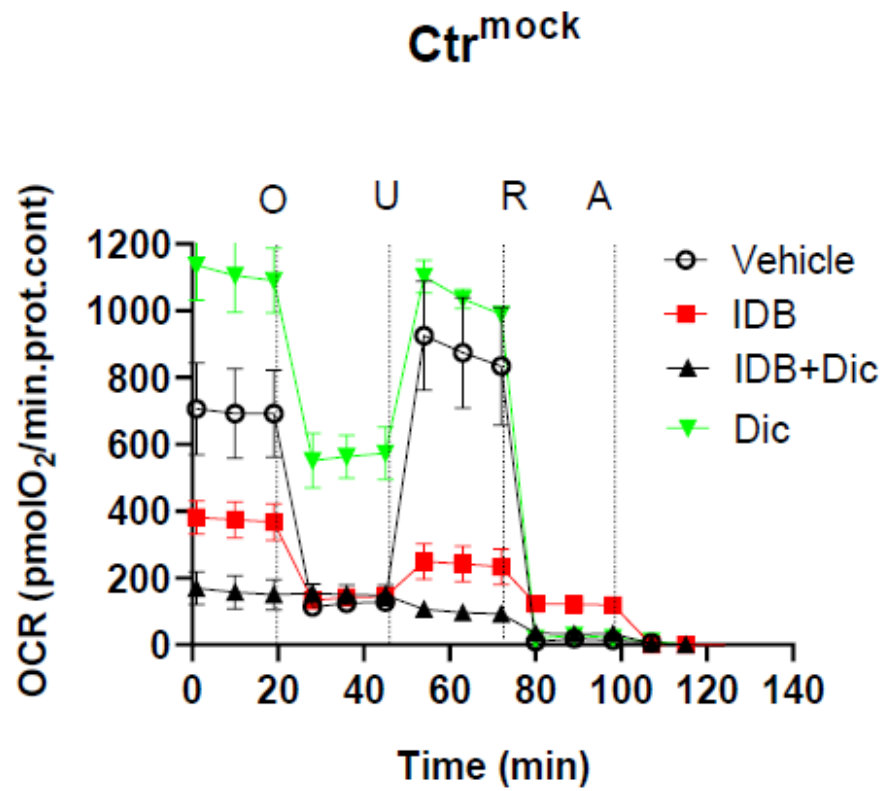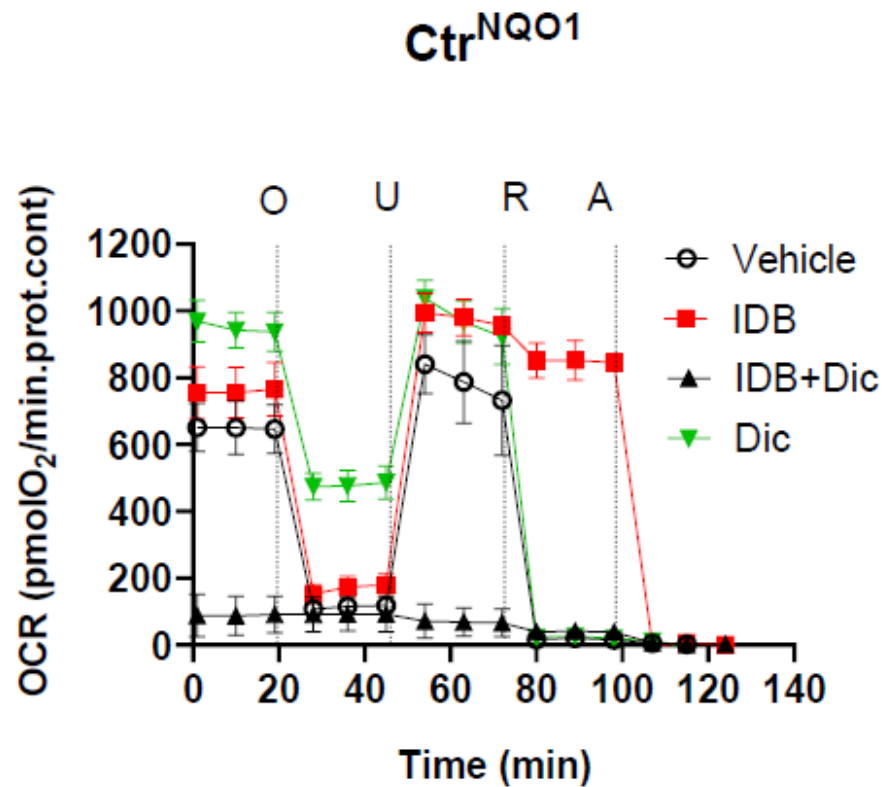

**Supplementary Figure 2 related to Figure 1B and 1C**

Mitochondrial respiration rates measured with Mito-stress protocol of control (Ctr<sup>mock</sup> and Ctr<sup>NQO1</sup>). Basal respiration (OCR basal), oligomycin (O) inhibited respiration (proton leak) and maximal respiration rate (OCR FCCP, U) were calculated subtracting the OCR in the presence of rotenone (R) and antimycin A (A). All values are normalized for protein cellular content measured by SRB assay. Empty circles correspond to OCR values measured in cells treated with the vehicle DMSO (ten and seven independent experiments for Ctr<sup>mock</sup> and 3460<sup>mock</sup>, respectively). Red squares correspond to OCR values measured in cells treated with 10  $\mu$ M idebenone (six and five independent experiments for Ctr<sup>mock</sup> and 3460<sup>mock</sup>, respectively). Green triangles correspond to OCR values measured in presence of 10  $\mu$ M dicoumarol, black triangles correspond to OCR values measured in presence of 10  $\mu$ M idebenone and 10  $\mu$ M dicoumarol (IDB+Dic) (two independent experiments for each concentration). Data are reported as mean  $\pm$  SD.

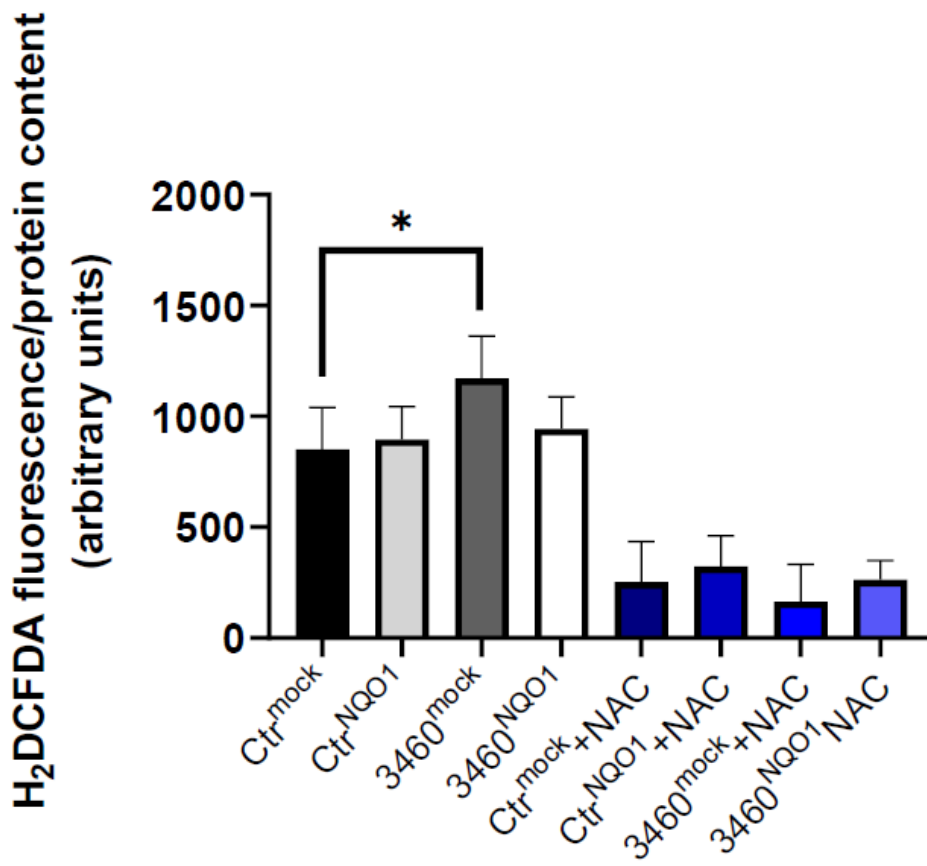

**Supplementary Figure 3 related to Figure 1E and 1F**

Rate of H<sub>2</sub>O<sub>2</sub> production in cells grown in 10 mM glucose, 5 mM pyruvate and 1 mM glutamine DMEM in presence or absence of 10 mM N-acetylcysteine (NAC). The H<sub>2</sub>O<sub>2</sub> production amount measured in the first 6h of the experiment is expressed as arbitrary unit of fluorescence corrected for the cellular protein content (SRB assay) as detailed in Materials and Methods. Data are reported as mean ± SEM of four to six independent experiments.

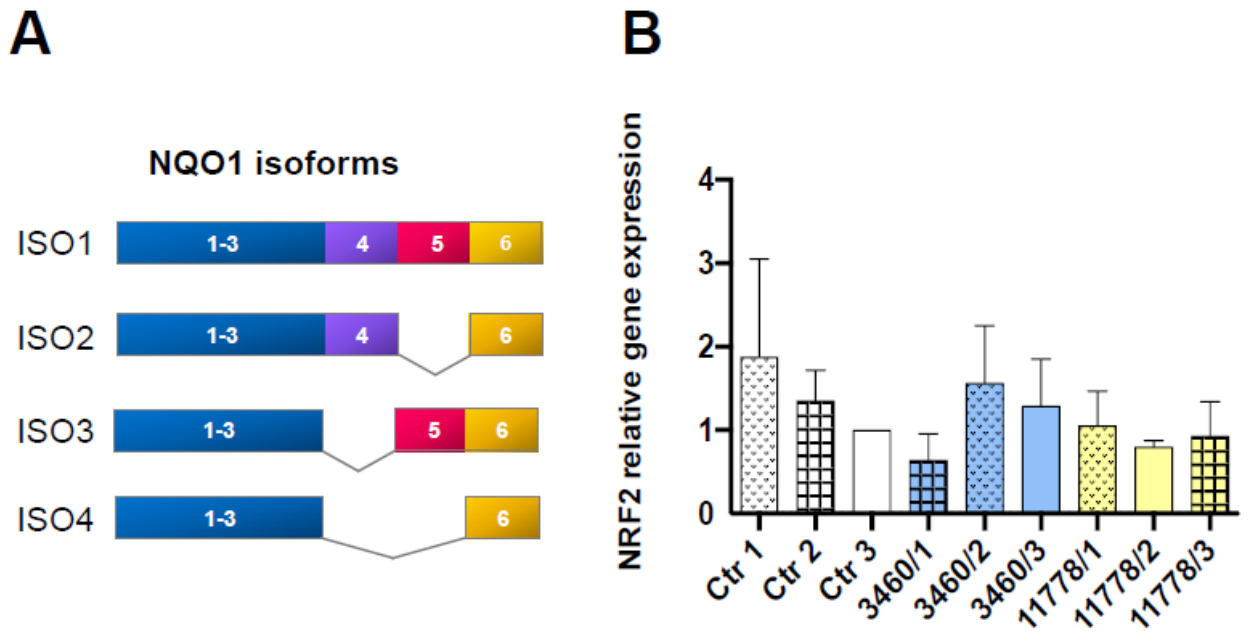

**Supplementary Figure 4 related to Figure 3**

NQO1 isoforms and NRF2 gene expression.

**A)** Schematic representation of the NQO1 transcript variants. Alternative splicing of exon 4 and 5 generate four

NQO1 variants (isoforms 1–4).

**B)** NRF2 gene expression evaluated by qPCR, with GAPDH was used as reference gene. Fold-changes are

normalized to Ctr3 and are expressed as means  $\pm$  SD of three independent experiments. Statistical analysis was

performed using one-way ANOVA test with a Dunnett's *post-hoc* test.

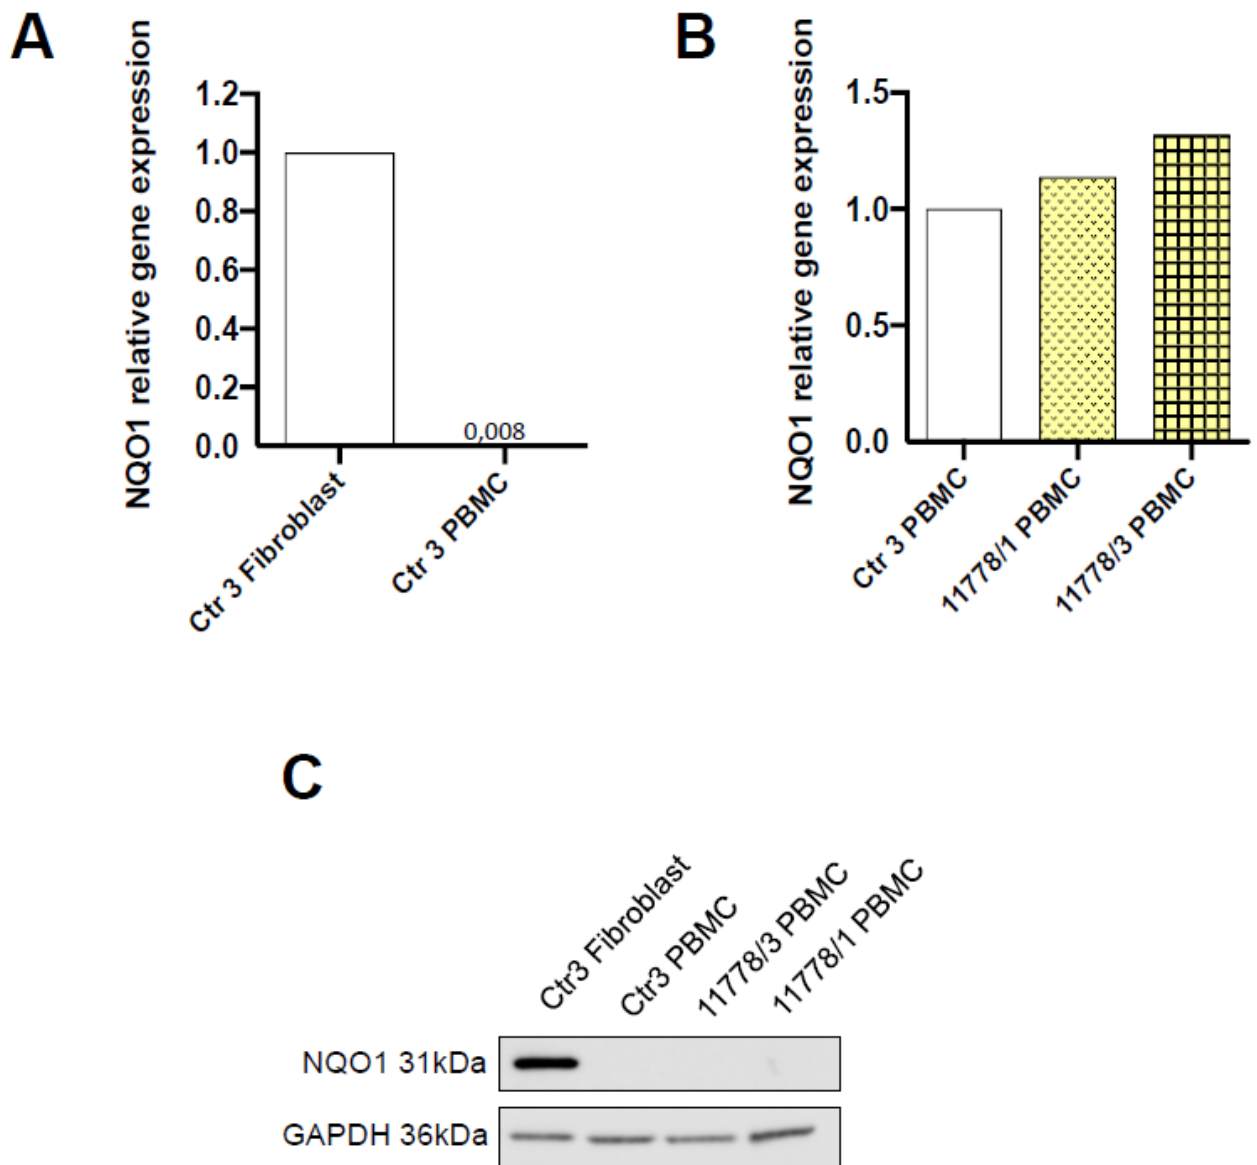

**Supplementary Figure 5 related to Figure 3**

NQO1 gene expression and protein levels in PBMC.

- A) *NQO1* gene expression evaluated by qPCR in fibroblasts and PBMC of Ctr3. GAPDH was used as reference gene.
- B) *NQO1* gene expression evaluated by qPCR in PBMC of Ctr3, 11778/1 and 11778/3. Fold-changes are normalized to Ctr3 and GAPDH was used as reference gene.
- C) Western blot analysis of NQO1 level in lysates from Ctr3 fibroblast and PBMC, and PBMC of 11778/1 and 11778/3. GAPDH was used as loading control.



**A**

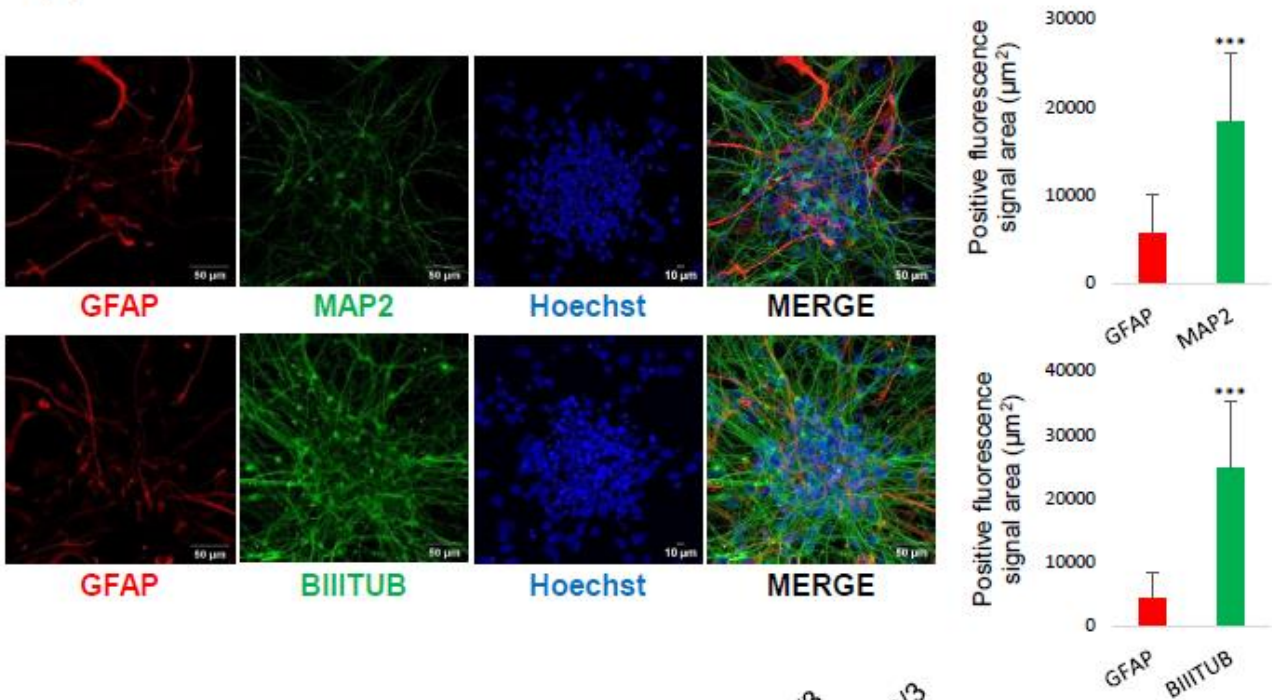

**B**

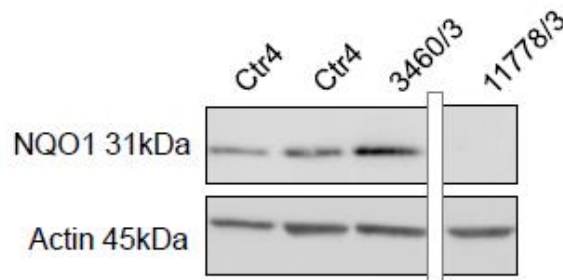

**C**

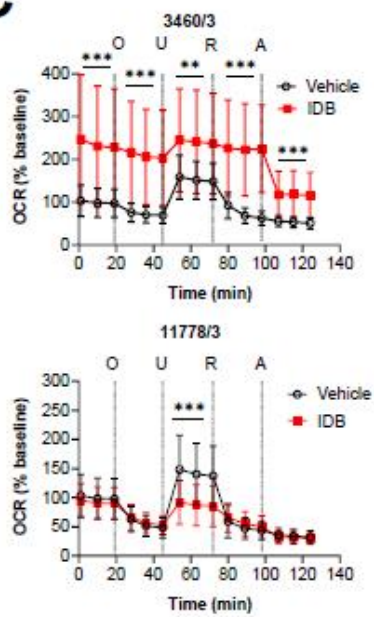

**D**

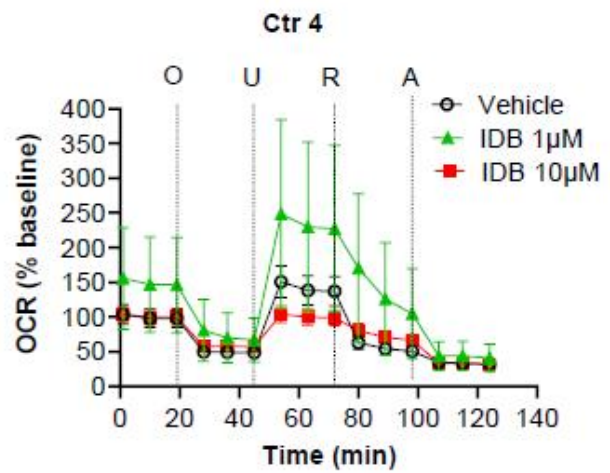

**Supplementary Figure 6 related to Figure 4C**

Analysis of NQO1 expression levels and effect of idebenone on OCR of iPSCs-derived neurons.

**A)** Immunofluorescence analysis of iPSCs-derived neuronal population differentiated from Ctr4. Representative images of the result obtained using two different antibodies specifically directed against neurons (MAP2 and  $\beta$ -TUBULIN shown in green) and one antibody against astrocytes (GFAP shown in red). Nuclei are stained with Hoechst (shown in blue).

A histogram reporting fluorescence quantification is presented on the right. Images were taken at 40X.

**B)** Western blot analysis of NQO1 level in cellular lysates from a control (two biological replicates of Ctr4), 3460/3 and 11778/3 iPSC-derived neurons. Actin was used as loading control. Due to the very low number of iPSC-derived neurons the western blot was performed only once.

**C)** OCR measurement in LHON (3460/3, 11778/3) iPSCs-derived neurons in presence or absence of idebenone. OCR measurements were obtained before and after addition of oligomycin (O), FCCP (U), rotenone (R) and antimycin A (A). OCR data were normalized on cell counts and expressed as a percentage of the baseline measurement of untreated lines. Open circles correspond to OCR values measured in cells treated with the vehicle DMSO, red squares to OCR values measured in cells treated with 10  $\mu$ M idebenone (IDB). Data are reported as mean  $\pm$  SD of 20 replicates for the untreated and 16 replicates for the idebenone-treated condition for 3460/3 neurons (derived from 1 experiment being 3460/3 NPCs particularly refractory to terminally differentiate into neurons); 66 replicates for the untreated condition and 54 replicates for the idebenone-treated condition for 11778/3 (derived from 4 independent experiments). Statistical analysis is the same reported in Figure 1B and Methods section. Asterisks denote values significantly different \*\*p < 0.01; \*\*\*p < 0.001.

**D)** OCR measurement in Ctr4 iPSCs-derived neurons in presence or absence of different idebenone concentrations (1  $\mu$ M in green and 10  $\mu$ M in red). 49 replicates for the untreated condition, 48 for the 10  $\mu$ M idebenone-treated condition (derived from 2 independent experiments), and 8 for the 1  $\mu$ M idebenone-treated condition (one experiment).

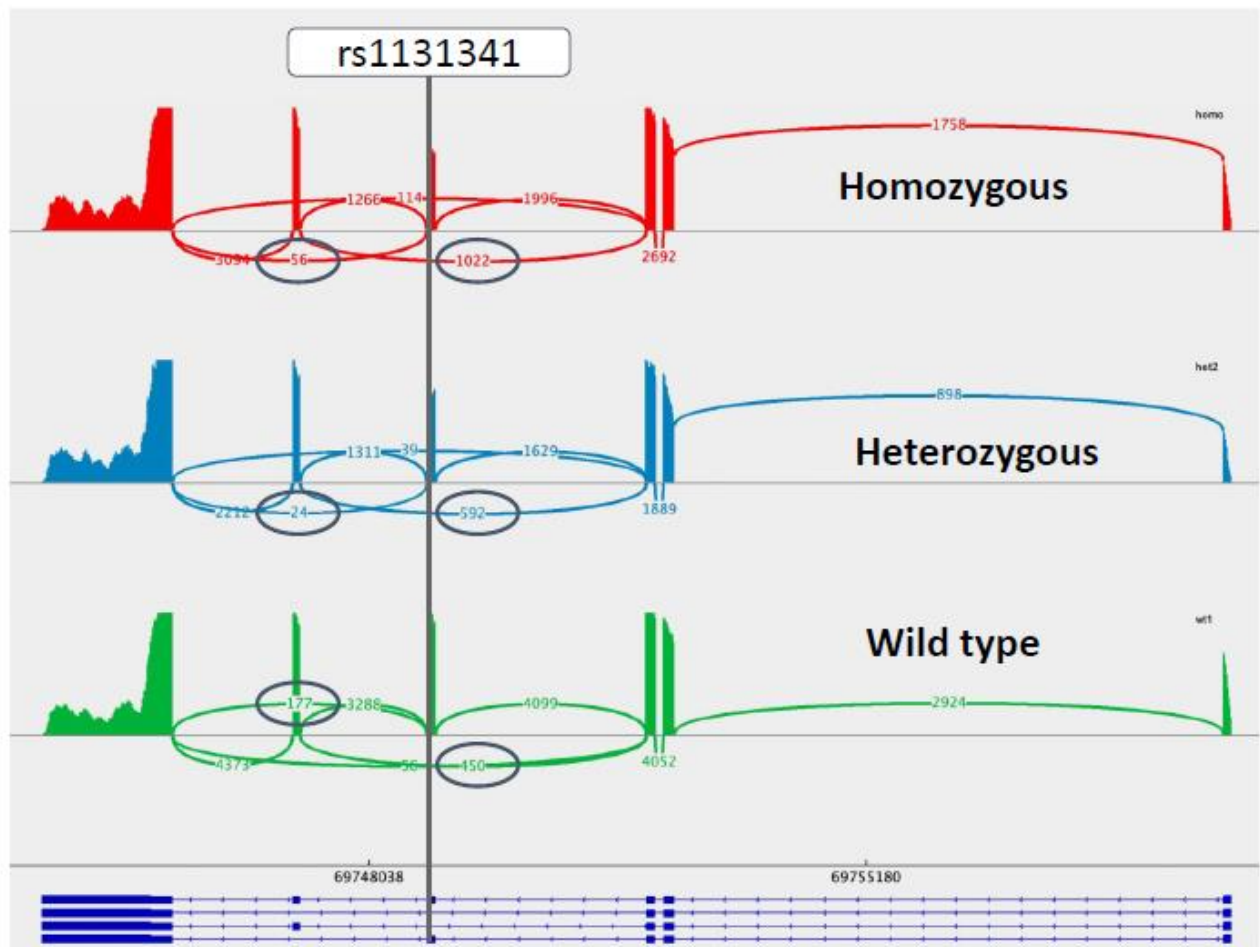

### Supplementary Figure 7 related to Figure 5

NQO1 Sashimi plot of exon skipping in homozygous rs1131341 carriers (red) and heterozygous carriers (blue) and unaffected fibroblasts (green). The RNA coverage is given as the log<sub>10</sub> RPKM-value and the number of split reads spanning the given intron is indicated on the exon-connecting lines. The gene model of the RefSeq annotation is depicted at the bottom.

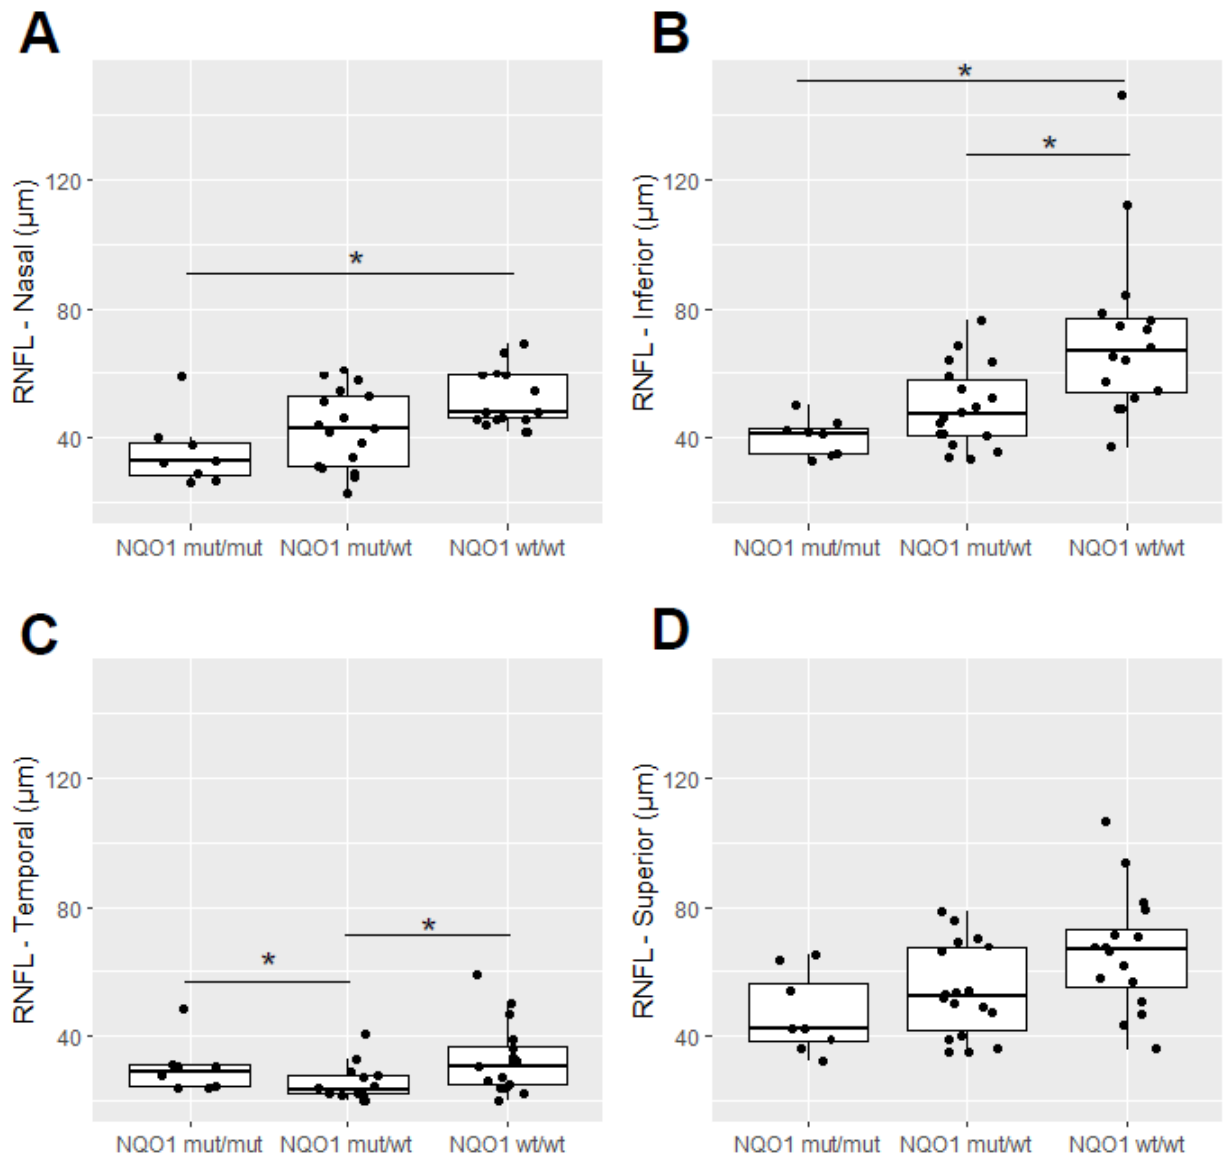

**Supplementary Figure 8 related to Figure 6**

Panels A – D show box plots of sectorial RNFL thickness at last visit in LHON patients referring to the clinical site IRCCS Istituto delle Scienze Neurologiche di Bologna, Bellaria Hospital (Bologna, Italy), with solid lines representing median value for *NQO1* mut/mut, *NQO1* mut/wt and *NQO1* wt/wt genotypes. All these patients were evaluated with swept-source OCT (DRI Triton OCT, *Topcon*, Tokyo, Japan). \* $p < 0.05$

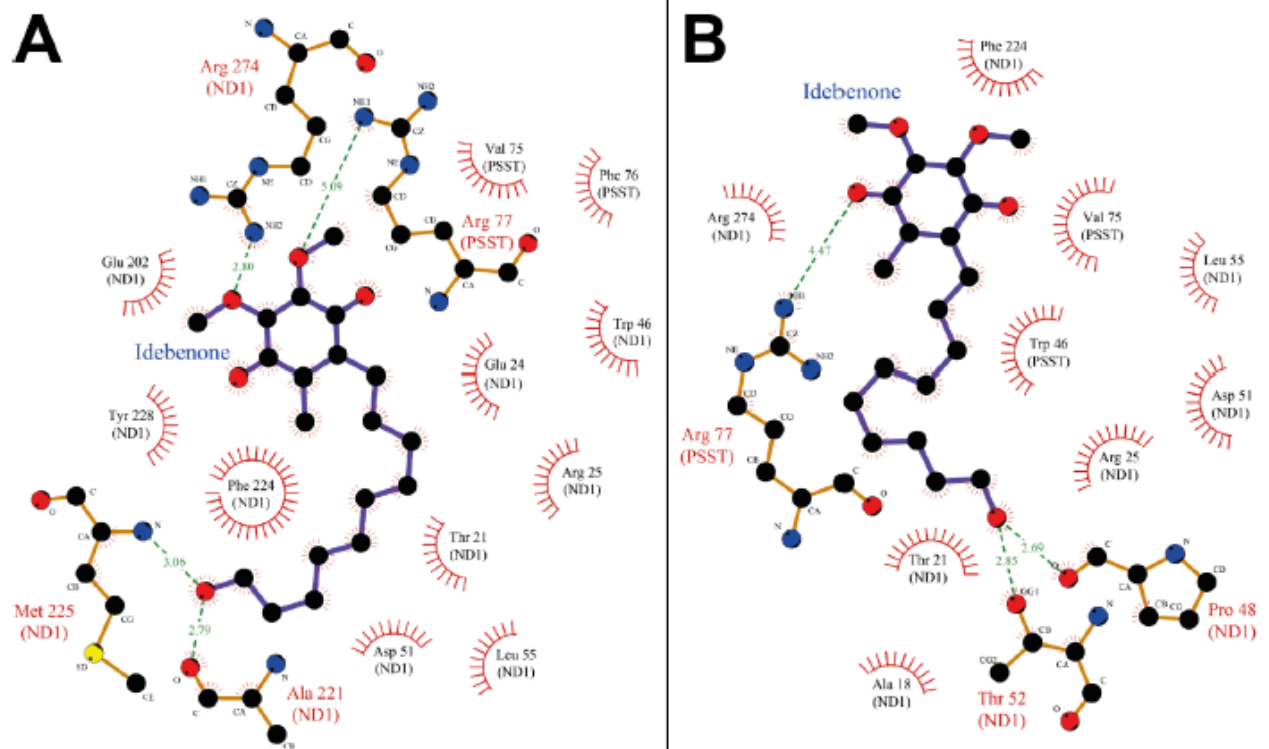

### Supplementary Figure 9 related to Figure 7

Detail of the intermolecular interactions of the best docking poses for idebenone in the WT (A) and A52T (ND1) mutated (B) CI. In the figure are represented H-bonds (green dashed lines) and van der Waals (red spiked arcs) interactions. The inhibitor, as well as CI residues H-bonded to them, are in ball-and-stick coloured according to the atom type.

**Supplementary Table 1 related to Figure 2B.** Demographic and clinical information of the six LHON patients from which fibroblast cell lines was derived

| Cell line | LHON mt.DNA mutation | Age at onset Right eye | Age at onset Left eye | Therapy (total daily dose) | Outcome                           |
|-----------|----------------------|------------------------|-----------------------|----------------------------|-----------------------------------|
| 3460/1    | m.3460G>A            | 17 years               | 16 years              | Idebenone<br>405 mg        | Non-Responder                     |
| 3460/2    | m.3460G>A            | 6 years                | 20 years              | Idebenone<br>675 mg        | Responder on the left eye treated |
| 3460/3    | m.3460G>A            | 16 years               | 16 years              | EPI-743<br>400 mg          | Non-Responder                     |
| 11778/1   | m.11778G>A           | 26 years               | 26 years              | Idebenone<br>405 mg        | Non-Responder                     |
| 11778/2   | m.11778G>A           | 26 years               | 25 years              | Idebenone<br>405 mg        | Responder                         |
| 11778/3   | m.11778G>A           | 25 years               | 25 years              | Idebenone<br>900 mg        | Non-Responder                     |

We defined the responder/non-responder status as assessed between nadir and last visit: responders were those eyes that experienced a VA improvement from off-chart to on-chart of at least 1 full line (5 letters), or an on-chart VA improvement of at least 2 lines (10 letters=0.2 logMar). Idebenone dosages differ from patient to patient as in most cases these patients were treated off label before EMA approval and current guidelines for treatments, which are set at 900 mg/day (300 mg x 3 with meals).

Supplementary Table 2 related to Figure 6A-D. Demographic and clinical features of LHON patients

|                                                                         | All                         | NQO1 mut/mut                | NQO1 mut/wt                 | NQO1 wt/wt                  |
|-------------------------------------------------------------------------|-----------------------------|-----------------------------|-----------------------------|-----------------------------|
| <b>N, subjects</b>                                                      | 118 (100%)                  | 13 (11%)                    | 34 (28.8%)                  | 71 (60.2%)                  |
| <b>Gender</b>                                                           |                             |                             |                             |                             |
| <b>Male</b>                                                             | 95 (80%)                    | 13 (100%)                   | 25 (74%)                    | 57 (80%)                    |
| <b>Female</b>                                                           | 23 (20%)                    | -                           | 9 (26%)                     | 14 (20%)                    |
| <b>Mutation</b>                                                         |                             |                             |                             |                             |
| <b>m.3460G&gt;A/MTND1</b>                                               | 23 (20%)                    | 7 (54%)                     | 7 (21%)                     | 9 (13%)                     |
| <b>m.11778G&gt;A/MTND4</b>                                              | 95 (80%)                    | 6 (46%)                     | 27 (79%)                    | 62 (87%)                    |
| <b>Interval of onset between eyes<sup>#</sup> (d)</b>                   | 80 ± 151<br>(0 - 91)        | 115 ± 162<br>(46 - 122)     | 51 ± 89<br>(0 - 62)         | 86 ± 171<br>(0 - 91)        |
| <b>N, eyes</b>                                                          | 233 (100%)                  | 26 (11.1%)                  | 67 (28.8%)                  | 140 (60.1%)                 |
| <b>Age at onset (y)</b>                                                 | 34 ± 17<br>(18 - 48)        | 27 ± 13<br>(17 - 33)        | 34 ± 18<br>(18 - 48)        | 35 ± 17<br>(19 - 49)        |
| <b>Time since onset at idebenone start<sup>‡</sup> (mo)</b>             | 8 ± 12<br>(2 - 8)           | 9 ± 15<br>(1 - 9)           | 8 ± 11<br>(2 - 9)           | 8 ± 11<br>(2 - 8)           |
| <b>BCVA at nadir<sup>†</sup> (logMar)</b>                               | 1.8 ± 0.5<br>(1.5 - 2.2)    | 1.8 ± 0.5<br>(1.6 - 2.2)    | 1.8 ± 0.4<br>(1.5 - 2.2)    | 1.7 ± 0.5<br>(1.4 - 2.1)    |
| <b>BCVA off-chart* at nadir<sup>†</sup></b>                             | 131 (56%)                   | 14 (54%)                    | 43 (64%)                    | 74 (53%)                    |
| <b>Time since nadir<sup>†</sup> at last visit<sup>††</sup> (mo)</b>     | 48 ± 35<br>(20 - 69)        | 48 ± 39<br>(13 - 81)        | 56 ± 40<br>(23 - 83)        | 44 ± 31<br>(17 - 59)        |
| <b>Primary visual outcome**</b>                                         |                             |                             |                             |                             |
| <b>Responder</b>                                                        |                             |                             |                             |                             |
| <b>Non-responder</b>                                                    | 122 (52%)<br>111 (48%)      | 7 (27%)<br>19 (73%)         | 35 (52%)<br>32 (48%)        | 80 (57%)<br>60 (43%)        |
| <b>BCVA at last visit<sup>††</sup> (logMar)</b>                         | 1.4 ± 0.6<br>(1 - 2.1)      | 1.7 ± 0.5<br>(1.4 - 2.1)    | 1.4 ± 0.6<br>(1.2 - 2.1)    | 1.4 ± 0.6<br>(1 - 2.1)      |
| <b>RNFL – AVG, at last visit<sup>††</sup> (µm)</b>                      |                             |                             |                             |                             |
| <b>Italians</b>                                                         | n = 85<br>55 ± 16 (42 - 66) | n = 10<br>42 ± 11 (33 - 49) | n = 34<br>54 ± 18 (40 - 63) | n = 41<br>59 ± 15 (48 - 68) |
| <b>Germans</b>                                                          | n = 96<br>49 ± 15 (38 - 55) | n = 11<br>41 ± 11 (35 - 47) | n = 19<br>49 ± 16 (35 - 57) | n = 66<br>49 ± 15 (39 - 55) |
| <b>Sectorial RNFL<sup>&amp;</sup> - at last visit<sup>††</sup> (µm)</b> |                             |                             |                             |                             |
| <b>Nasal</b>                                                            | n = 42<br>43 ± 13 (33 - 54) | n = 8<br>35 ± 10 (28 - 38)  | n = 18<br>41 ± 13 (31 - 52) | n = 16<br>50 ± 12 (46 - 59) |
| <b>Inferior</b>                                                         | 56 ± 22 (41 - 65)           | 44 ± 6 (35 - 43)            | 50 ± 13 (41 - 58)           | 72 ± 27 (54 - 78)           |
| <b>Temporal</b>                                                         | 28 ± 9 (22 - 31)            | 31 ± 8 (24 - 31)            | 24 ± 6 (20 - 26)            | 33 ± 11 (25 - 37)           |
| <b>Superior</b>                                                         | 57 ± 17 (42 - 68)           | 47 ± 12 (38 - 56)           | 54 ± 14 (41 - 67)           | 66 ± 19 (55 - 73)           |

Values are given as n (%) or mean ± SD and (Q1-Q3).

Based on the studied NQO1 variants: NQO1 mut/mut stands for heterozygous at both polymorphic sites, meaning compound heterozygote, or homozygous either at one or the other polymorphic site; NQO1 mut/wt stands for heterozygous at only one of the two polymorphic sites; NQO1 wt/wt stands for wildtype at both polymorphic sites.

<sup>#</sup> Time between onset of first and second affected eye.

‡ Time from LHON symptom onset to start of idebenone-treatment.

† Nadir is defined as the value when BCVA reached its worst point (= highest logMar value).

\* If BCVA was > 1.68 logMar or off-chart [regardless of being assessed as counting fingers (2.1 logMar), hand motion (2.2 logMar), light perception (2.3 logMar) or no-light perception (2.8 logMar)].

†† Last visit (LV) corresponds to the last observation before stopping the therapy or, for patients still receiving idebenone, is the last visit available.

& Sectorial RNFL thicknesses at last visit are related to subgroup of LHON patients referring to the clinical site IRCCS Istituto delle Scienze Neurologiche di Bologna, Bellaria Hospital (Bologna, Italy).

\*\* Responder outcome is defined as a VA improvement: from “off-chart” (the equivalent of counting fingers, CF/ hand motion, HM/light perception, LP or no-light perception, NLP) to at least 1.6 logMar value or of at least 0.2 logMar value within “on-chart”.

d, days; y, years; mo, months; BCVA, best-corrected visual acuity; logMar, logarithm of the minimal angle of resolution; RNFL, peripapillary retinal nerve fiber; AVG, average thickness.



Supplementary Table 3 related to Figure 6E-H. Demographic and clinical features of m.11778G&gt;A/MTND4

## LHON patients

|                                                                     | All                         | NQO1 mut/mut              | NQO1 mut/wt                 | NQO1 wt/wt                  |
|---------------------------------------------------------------------|-----------------------------|---------------------------|-----------------------------|-----------------------------|
| <b>N, subjects</b>                                                  | 95 (100%)                   | 6 (6%)                    | 27 (28%)                    | 62 (66%)                    |
| <b>Gender</b>                                                       |                             |                           |                             |                             |
| <b>Male</b>                                                         | 78 (82%)                    | 6 (100%)                  | 21 (78%)                    | 51 (82%)                    |
| <b>Female</b>                                                       | 17 (18%)                    | -                         | 6 (22%)                     | 11 (18%)                    |
| <b>Interval of onset between eyes<sup>#</sup> (d)</b>               | 84 ± 161<br>(0 - 94)        | 158 ± 226<br>(61 -130)    | 58 ± 98<br>(0 - 84)         | 87 ± 175<br>(0 - 92)        |
| <b>N, eyes</b>                                                      | 187 (100%)                  | 12 (6.4%)                 | 53 (28.4%)                  | 122 (65.2%)                 |
| <b>Age at onset (y)</b>                                             | 33 ± 17<br>(18 - 45)        | 26 ± 9<br>(17 - 33)       | 31 ± 17<br>(18 - 45)        | 35 ± 17<br>34 (18 - 49)     |
| <b>Time since onset at idebenone start<sup>¥</sup> (mo)</b>         | 8 ± 12<br>(2 - 8)           | 14 ± 21<br>(1 - 16)       | 8 ± 12<br>(3 - 9)           | 7 ± 11<br>(2 - 8)           |
| <b>BCVA at nadir<sup>†</sup> (logMar)</b>                           | 1.8 ± 0.5<br>(1.5 - 2.1)    | 1.8 ± 0.3<br>(1.6 - 2.1)  | 1.8 ± 0.5<br>(1.5 - 2.2)    | 1.7 ± 0.5<br>(1.4 - 2.1)    |
| <b>BCVA off-chart* at nadir<sup>†</sup></b>                         | 103 (55%)                   | 5 (42%)                   | 33 (62%)                    | 65 (53%)                    |
| <b>Time since nadir<sup>†</sup> at last visit<sup>††</sup> (mo)</b> | 47 ± 34<br>(17 - 67)        | 56 ± 50<br>(14 - 91)      | 59 ± 42<br>(24 - 83)        | 42 ± 27<br>(16 - 57)        |
| <b>Primary visual outcome**</b>                                     |                             |                           |                             |                             |
| <b>Responder</b>                                                    |                             |                           |                             |                             |
| <b>Non-responder</b>                                                | 104 (56%)<br>83 (44%)       | 5 (42%)<br>7 (58%)        | 29 (55%)<br>24 (45%)        | 70 (57%)<br>52 (43%)        |
| <b>BCVA at last visit<sup>††</sup> (logMar)</b>                     | 1.4 ± 0.6<br>(1 - 2)        | 1.4 ± 0.5<br>(1.3 - 1.7)  | 1.4 ± 0.6<br>(1.1 - 1.7)    | 1.4 ± 0.6<br>(1 - 2)        |
| <b>RNFL – AVG, at last visit<sup>††</sup> (µm)</b>                  |                             |                           |                             |                             |
| <b>Italians</b>                                                     | n = 69<br>58 ± 16 (48 - 68) | n = 8<br>45 ± 9 (39 - 51) | n = 26<br>58 ± 17 (44 - 66) | n = 35<br>62 ± 14 (52 - 69) |
| <b>Germans</b>                                                      | n = 71<br>50 ± 15 (40 - 57) | n = 2<br>45 ± 3 (44 - 46) | n = 13<br>51 ± 13 (42 - 57) | n = 56<br>50 ± 16 (39 - 56) |

Values are given as n (%) or mean ± SD and (Q1-Q3).

Based on the studied NQO1 variants: NQO1 mut/mut stands for heterozygous at both polymorphic sites, meaning compound heterozygote, or homozygous either at one or the other polymorphic site; NQO1 mut/wt stands for heterozygous at only one of the two polymorphic sites; NQO1 wt/wt stands for wildtype at both polymorphic sites.

<sup>#</sup> Time between onset of first and second affected eye.

<sup>¥</sup> Time from LHON symptom onset to start of idebenone-treatment.

<sup>†</sup> Nadir is defined as the value when BCVA reached its worst point (= highest logMar value).

\* If BCVA was > 1.68 logMar or off-chart [regardless of being assessed as counting fingers (2.1 logMar), hand motion (2.2 logMar), light perception (2.3 logMar) or no-light perception (2.8 logMar)].

<sup>††</sup> Last visit (LV) corresponds to the last observation before stopping the therapy or, for patients still receiving idebenone, is the last visit available.

\*\* Responder outcome is defined as a VA improvement: from “off-chart” (the equivalent of counting fingers, CF/ hand motion, HM/light perception, LP or no-light perception, NLP) to at least 1.6 logMar value or of at least 0.2 logMar value within “on-chart”.

d, days; y, years; mo, months; BCVA, best-corrected visual acuity; logMar, logarithm of the minimal angle of resolution; RNFL, peripapillary retinal nerve fiber; AVG, average thickness.

**Supplementary Table 4 Related to Figure 6I-L. Demographic and clinical features of m.3460G>A/MTND1**

**LHON patients**

|                                                                     | All                         | NQO1 mut/mut                | NQO1 mut/wt                | NQO1 wt/wt                 |
|---------------------------------------------------------------------|-----------------------------|-----------------------------|----------------------------|----------------------------|
| <b>N, subjects</b>                                                  | 23 (100 %)                  | 7 (30.5%)                   | 7 (30.5%)                  | 9 (39%)                    |
| <b>Gender</b>                                                       |                             |                             |                            |                            |
| <b>Male</b>                                                         | 17 (74%)                    | 7 (100%)                    | 4 (57%)                    | 6 (67%)                    |
| <b>Female</b>                                                       | 6 (26%)                     | -                           | 3 (43%)                    | 3 (33%)                    |
| <b>Interval of onset between eyes<sup>#</sup> (d)</b>               | 64 ± 104<br>(0 - 76)        | 79 ± 78<br>(26 - 106)       | 24 ± 30<br>(1 - 43)        | 83 ± 149<br>(0 - 76)       |
| <b>N, eyes</b>                                                      | 46 (100%)                   | 14 (30.4%)                  | 14 (30.4%)                 | 18 (39.2%)                 |
| <b>Age at onset (y)</b>                                             | 37 ± 19<br>(18 - 56)        | 27 ± 17<br>(17 - 41)        | 45 ± 19<br>(29 - 58)       | 37 ± 17<br>(19 - 44)       |
| <b>Time since onset at idebenone start<sup>‡</sup> (mo)</b>         | 7 ± 8<br>(2 - 9)            | 5 ± 4<br>(2 - 5)            | 7 ± 6<br>(2 - 10)          | 9 ± 12<br>(3 - 7)          |
| <b>BCVA at nadir<sup>†</sup> (logMar)</b>                           | 1.9 ± 0.4<br>(1.6 - 2.2)    | 1.8 ± 0.7<br>(1.6 - 2.2)    | 1.9 ± 0.3<br>(1.7 - 2.2)   | 1.8 ± 0.4<br>(1.4 - 2.2)   |
| <b>BCVA off-chart* at nadir<sup>†</sup></b>                         | 28 (61%)                    | 9 (64%)                     | 10 (71%)                   | 9 (50%)                    |
| <b>Time since nadir<sup>†</sup> at last visit<sup>††</sup> (mo)</b> | 53 ± 37<br>(26 - 81)        | 43 ± 30<br>(15 - 59)        | 46 ± 31<br>(21 - 74)       | 63 ± 44<br>(30 - 80)       |
| <b>Primary visual outcome**</b>                                     |                             |                             |                            |                            |
| <b>Responder</b>                                                    |                             |                             |                            |                            |
| <b>Non-responder</b>                                                | 18 (39%)<br>28 (61%)        | 2 (14%)<br>12 (86%)         | 6 (43%)<br>8 (57%)         | 10 (56%)<br>8 (44%)        |
| <b>BCVA at last visit<sup>††</sup> (logMar)</b>                     | 1.6 ± 0.6<br>(1.2 - 2.1)    | 1.9 ± 0.4<br>(1.6 - 2.1)    | 1.6 ± 0.5<br>(1.3 - 2.1)   | 1.4 ± 0.6<br>(0.9 - 2.1)   |
| <b>RNFL – AVG, at last visit<sup>††</sup> (µm)</b>                  |                             |                             |                            |                            |
| <b>Italians</b>                                                     | n = 16<br>41 ± 11 (30 - 46) | n = 2<br>29 ± 0.7 (29 - 30) | n = 8<br>40 ± 12 (30 - 46) | n = 6<br>46 ± 8 (41 - 45)  |
| <b>Germans</b>                                                      | n = 25<br>45 ± 14 (35 - 53) | n = 9<br>41 ± 12 (35 - 48)  | n = 6<br>46 ± 22 (32 - 63) | n = 10<br>47 ± 8 (40 - 53) |

Values are given as n (%) or mean ± SD and (Q1-Q3).

Based on the studied NQO1 variants: NQO1 mut/mut stands for heterozygous at both polymorphic sites, meaning compound heterozygote, or homozygous either at one or the other polymorphic site; NQO1 mut/wt stands for heterozygous at only one of the two polymorphic sites; NQO1 wt/wt stands for wildtype at both polymorphic sites.

<sup>#</sup> Time between onset of first and second affected eye.

<sup>‡</sup> Time from LHON symptom onset to start of idebenone-treatment.

<sup>†</sup> Nadir is defined as the value when BCVA reached its worst point (= highest logMar value).

\* If BCVA was > 1.68 logMar or off-chart [regardless of being assessed as counting fingers (2.1 logMar), hand motion (2.2 logMar), light perception (2.3 logMar) or no-light perception (2.8 logMar)].

<sup>††</sup> Last visit (LV) corresponds to the last observation before stopping the therapy or, for patients still receiving idebenone, is the last visit available.

\*\* Responder outcome is defined as a VA improvement: from “off-chart” (the equivalent of counting fingers, CF/ hand motion, HM/light perception, LP or no-light perception, NLP) to at least 1.6 logMar value or of at least 0.2 logMar value within “on-chart”.

d, days; y, years; mo, months; BCVA, best-corrected visual acuity; logMar, logarithm of the minimal angle of resolution; RNFL, peripapillary retinal nerve fiber; AVG, average thickness.

**Supplementary Table 5. Primers list for *NQO1* isoforms and NRF2 expression. Related to STAR Methods**

| <b>Primer</b>   | <b>Sequence</b>           |
|-----------------|---------------------------|
| GAPDH Fw        | AGCCACATCGCTCAGACAC       |
| GAPDH Rv        | GCCCAATACGACCAAATCC       |
| NQO1 Fw         | CTCACCGAGAGCCTAGTTCC      |
| NQO1 Rv         | TCAGTGCTCTTCTGCCGAC       |
| NQO1-ISO1 Fw    | GCTGGTTTGAGCGAGTGTTTC     |
| NQO1-ISO1 Rv    | CTGCCTTCTTACTCCGGAAGG     |
| NQO1-ISO2 Fw    | GACCCTTCCGGAGTGGCA        |
| NQO1-ISO2 Rv    | TGGAGTGTGCCCAATGCTAT      |
| NQO1-ISO3 Fw    | ACCTTGTGATATTCCAGAGTAAGAA |
| NQO1-ISO3 Rv    | CTGGAGTGTGCCCAATGCTA      |
| NQO1-ISO4 Fw    | CCTTGTGATATTCCAGAGTGGC    |
| NQO1-ISO4 Rv    | CTGGAGTGTGCCCAATGCTA      |
| NRF (NFE2L2) Fw | ATCCATTCCTGAGTTACAGTGTCT  |
| NRF (NFE2L2) Rv | AGTTTGGCTTCTGGACTTGGA     |

**Supplementary Table 6. Primer list for NQO1 sequencing. Related to STAR Methods**

| <b>Primer</b> | <b>Sequence</b>           |
|---------------|---------------------------|
| NQO1_1F       | GAAGTGTGTTGTATGGGCCC      |
| NQO1_1R       | GCTCATCCCAGGTCCCTAAT      |
| NQO1_2-3F     | CACAGAGCCCAGTTGTCAAC      |
| NQO1_2-3R     | ACATGCAACAGTAATACAGCCA    |
| NQO1_4-6F     | TGTTGATACCACACTACTAAAGCA  |
| NQO1_4-6R     | GATGACTGCAGCAAAGAAGAGATTT |

**Supplementary Table 7. Primers list for NQO1 SNaPshot assay. Related to STAR Methods**

| <b>Primer</b> | <b>Sequence</b>                        |
|---------------|----------------------------------------|
| NQO1_R139W_F  | CCTTCTGGGCTTGGGGAG                     |
| NQO1_R139W_R  | AACAAACACCCCTGCATCAG                   |
| NQO1_R139W_SS | GCTGCCATGTATGACAAAGGACCCTTC            |
| NQO1_P187S_F  | CTTACCTCTCTGTGCTTTCTGTA                |
| NQO1_P187S_R  | GGAAGCCTGGAAAGATACCC                   |
| NQO1_P187S_SS | GACTGACTCTGCATTTCTGTGGCTTCCAAGTCTTAGAA |
